# Supplementary material for: Identification of Potential Biomarkers in the Cervicovaginal Fluid by Metabolic Profiling for Preterm Birth
Source: PubMed Central journal article supplement (PMC7570126; doi:10.3390/metabo10090349), 2020-08-27
Supplement: metabolites-10-00349-s001.pdf [file metabolites-10-00349-s001.pdf]

1 *Original Article*

2

3 **Supplementary Materials: Identification of potential**  
4 **biomarkers in the cervicovaginal fluid by metabolic**  
5 **profiling for preterm birth**

6 **AbuZar Ansari, Heeyeon Lee, Young-Ah You, Youngae Jung, Sunwha Park, Soo Min**  
7 **Kim, Geum-Sook Hwang, Young Ju Kim**

8

9 **Supplementary Table 1. <sup>1</sup>H-NMR chemical shift and relative concentrations of identified**  
 10 **metabolites in CVF from PTB and TB.**

| Metabolites            | Chemical shifts ( $\delta$ <sup>1</sup> H ppm) |
|------------------------|------------------------------------------------|
| Acetate                | 1.90 (s)                                       |
| Acetone                | 2.22 (s)                                       |
| Alanine                | 1.47 (d), 3.78(q)                              |
| Aspartate              | 2.67 (dd), 2.80 (dd), 3.89 (dd)                |
| Choline                | 3.19 (s)                                       |
| Creatine               | 3.02 (s), 3.92 (s)                             |
| Ethanol                | 1.17 (t), 3.65 (q)                             |
| Ethylene glycol        | 3.66 (s)                                       |
| Formate                | 8.44 (s)                                       |
| Glucose                | 3.23 (t), 3.40-3.90 (m), 4.64 (d), 5.23 (d)    |
| Glutamate              | 2.05 (m), 2.12 (m), 2.30-2.38 (m), 3.75 (dd)   |
| Glycine                | 3.55 (s)                                       |
| Glycolate              | 3.93 (s)                                       |
| Histidine              | 7.11 (s), 7.94 (s)                             |
| Hypoxanthine           | 8.18 (s), 8.20 (s)                             |
| Isoleucine             | 0.93 (t), 1.00 (d)                             |
| Isopropanol            | 1.16 (d), 4.02 (m)                             |
| Lactate                | 1.32 (d), 4.10 (q)                             |
| Leucine                | 0.95 (dd), 1.65-1.75 (m)                       |
| Methanol               | 3.34 (s)                                       |
| Phenylalanine          | 7.32 (d), 7.37 (t), 7.42 (t)                   |
| Pyruvate               | 2.36 (s)                                       |
| Succinate              | 2.39 (s)                                       |
| Taurine                | 3.25 (t), 3.41 (t)                             |
| Threonine              | 4.24 (m)                                       |
| Trimethylamine N-oxide | 3.25 (s)                                       |
| Tyrosine               | 6.89 (d), 7.18 (d)                             |
| Valine                 | 0.98 (d), 1.03 (d), 2.26 (m), 3.60 (d)         |

11  
 12 Letters in parentheses denote the peak multiplicities: s, singlet; d, double; t, triplet; dd, doublet  
 13 of doublet and m, multiplets.  
 14

15 **Supplementary Table 2: The false discovery rate (FDR) of metabolites.**

| <b>Rank</b> | <b>Metabolite</b>      | <b>p-Value</b> | <b>q-value</b> |
|-------------|------------------------|----------------|----------------|
| 1           | Glycolate              | <b>0.0001</b>  | <b>0.0025</b>  |
| 2           | Ethylene glycol        | <b>0.0001</b>  | <b>0.0017</b>  |
| 3           | Trimethylamine N-oxide | <b>0.0002</b>  | <b>0.0020</b>  |
| 4           | Methanol               | <b>0.0004</b>  | <b>0.0029</b>  |
| 5           | Isopropanol            | <b>0.0008</b>  | <b>0.0047</b>  |
| 6           | Acetone                | <b>0.0015</b>  | <b>0.0070</b>  |
| 7           | Formate                | <b>0.0022</b>  | <b>0.0088</b>  |
| 8           | Alanine                | <b>0.0029</b>  | <b>0.0101</b>  |
| 9           | Isoleucine             | <b>0.0041</b>  | <b>0.0129</b>  |
| 10          | Glycine                | <b>0.0064</b>  | <b>0.0179</b>  |
| 11          | Aspartate              | <b>0.0104</b>  | <b>0.0266</b>  |
| 12          | Leucine                | <b>0.0113</b>  | <b>0.0264</b>  |
| 13          | Phenylalanine          | <b>0.0155</b>  | <b>0.0333</b>  |
| 14          | Valine                 | <b>0.0242</b>  | <b>0.0483</b>  |
| 15          | Tyrosine               | <b>0.0279</b>  | 0.0520         |
| 16          | Lactate                | <b>0.0299</b>  | 0.0524         |
| 17          | Ethanol                | <b>0.0481</b>  | 0.0793         |
| 18          | Glutamate              | 0.0895         | 0.1393         |
| 19          | Choline                | 0.0949         | 0.1399         |
| 20          | Pyruvate               | 0.0949         | 0.1329         |
| 21          | Acetate                | 0.1191         | 0.1587         |
| 22          | Histidine              | 0.2902         | 0.3693         |
| 23          | Hypoxanthine           | 0.3163         | 0.3851         |
| 24          | Succinate              | 0.3731         | 0.4353         |
| 25          | Threonine              | 0.5220         | 0.5847         |
| 26          | Glucose                | 0.6163         | 0.6638         |
| 27          | Creatine               | 0.7175         | 0.7440         |
| 28          | Taurine                | 0.9778         | 0.9778         |

16

17 **Supplementary Table 3 Predictive performance for the combined model of metabolites**  
 18 **and CL.**

| <b>Combined Model</b>                     | <b>AUC.</b> | <b>SEN.</b> | <b>SPE.</b> | <b>PPV.</b> | <b>NPV.</b> | <b>95% CI.</b> | <b>p-Value</b> |
|-------------------------------------------|-------------|-------------|-------------|-------------|-------------|----------------|----------------|
| Glycolate + Isopropanol                   | 0.88        | 90.9        | 84.4        | 66.7        | 96.4        | 0.74 – 0.96    | <0.0001        |
| Glycolate + Methanol                      | 0.88        | 90.9        | 87.5        | 71.4        | 96.5        | 0.75 – 0.96    | <0.0001        |
| Glycolate + Formate                       | 0.84        | 90.9        | 78.1        | 58.8        | 96.1        | 0.70 – 0.93    | <0.0001        |
| Glycolat + Isopropanol + Methanol         | 0.77        | 72.7        | 90.6        | 72.7        | 90.6        | 0.62 - 0.89    | 0.0050         |
| Glycolate + Isopraponol +<br>Formate      | 0.83        | 90.9        | 78.1        | 58.8        | 96.1        | 0.68 – 0.93    | <0.0001        |
| Glycolate + Isopropanol + CL              | 0.81        | 90.9        | 75.0        | 55.6        | 96.0        | 0.66 – 0.91    | 0.0010         |
| Glycolate + Methanol + CL                 | 0.80        | 90.9        | 75.0        | 55.6        | 96.0        | 0.65 – 0.91    | 0.0010         |
| Glycolate + Formate + CL                  | 0.82        | 90.9        | 75.0        | 55.6        | 96.0        | 0.68 – 0.92    | 0.0010         |
| Glycolat + Isopropanol + Methanol<br>+ CL | 0.81        | 90.9        | 75.0        | 55.6        | 96.0        | 0.66 – 0.91    | 0.0010         |
| Glycolate + Isopraponol +<br>Formate + CL | 0.81        | 81.8        | 81.3        | 60.0        | 92.9        | 0.66 – 0.92    | 0.0010         |

19 Receiver Operating Characteristics (ROC) curve analysis was performed for statistical analysis, and  $p < 0.05$   
 20 considered as significant. AUC: Area under the curve; SEN: Sensitivity; SPE: Specificity; PPV: Positive predictive  
 21 value; NPV: Negative predictive value; CI: Confidence interval; CL: Cervical length.

22

23

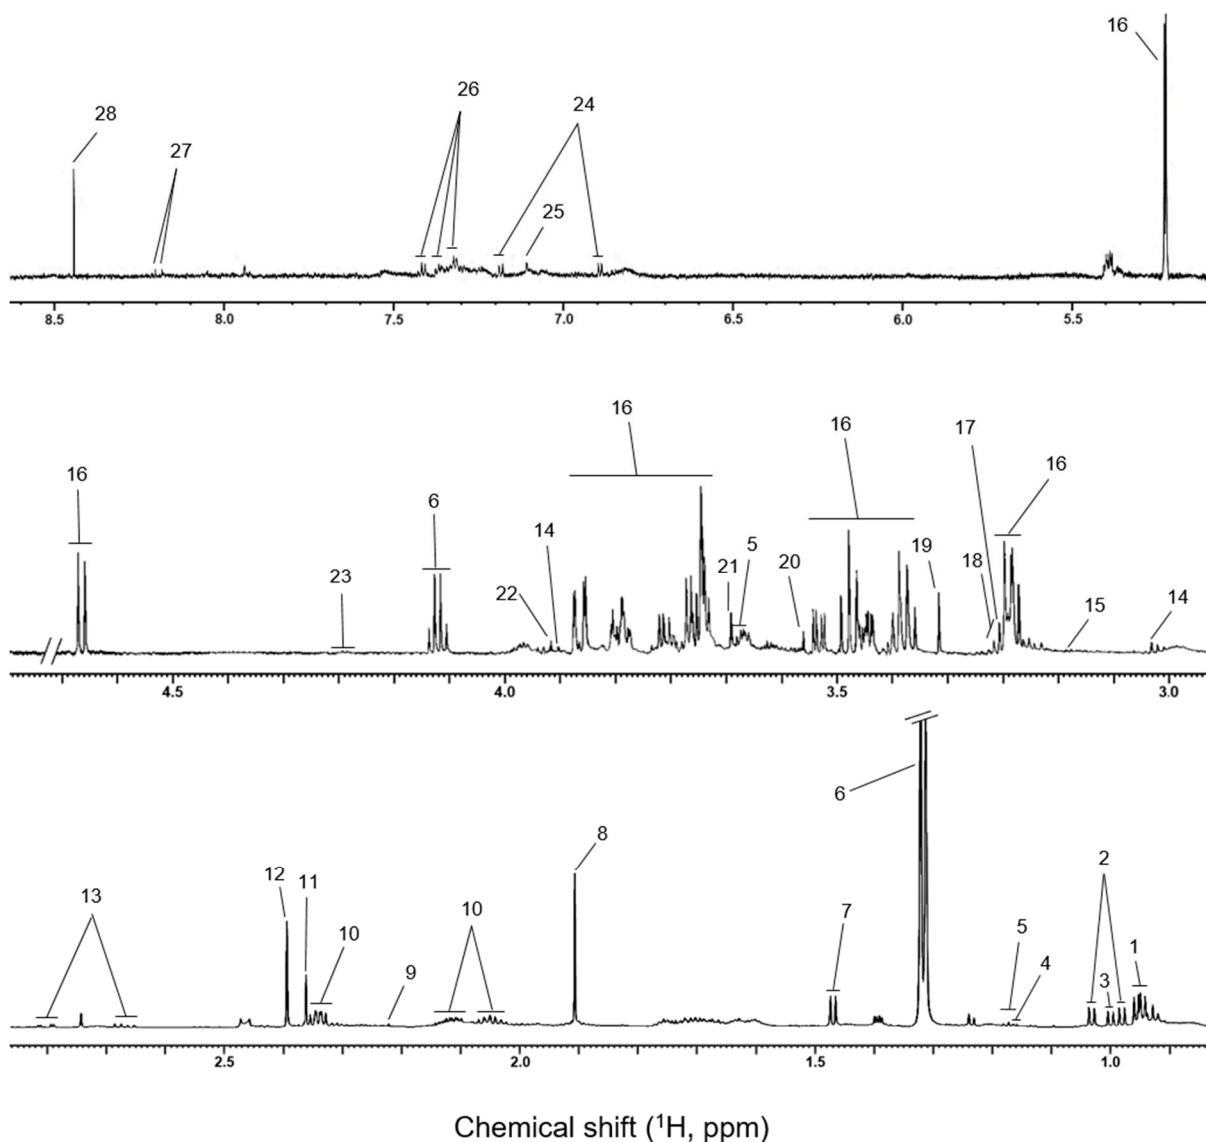

24

25 **Supplementary Figure 1. Representative 800-MHz  $^1\text{H}$ -NMR spectrum obtained from the**  
 26 **CVF sample.** Key: 1. leucine; 2. valine; 3. isoleucine; 4. isopropanol; 5. ethanol; 6. lactate; 7.  
 27 alanine; 8. acetate; 9. acetone; 10. glutamate; 11. pyruvate; 12. succinate; 13. aspartate; 14.  
 28 creatine; 15. choline; 16. glucose; 17. trimethylamine N-oxide; 18. taurine; 19. methanol; 20.  
 29 glycine; 21. ethylene glycol; 22. glycolate; 23. threonine; 24. tyrosine; 25. histidine; 26.  
 30 phenylalanine; 27. hypoxanthine; 28. formate.

31

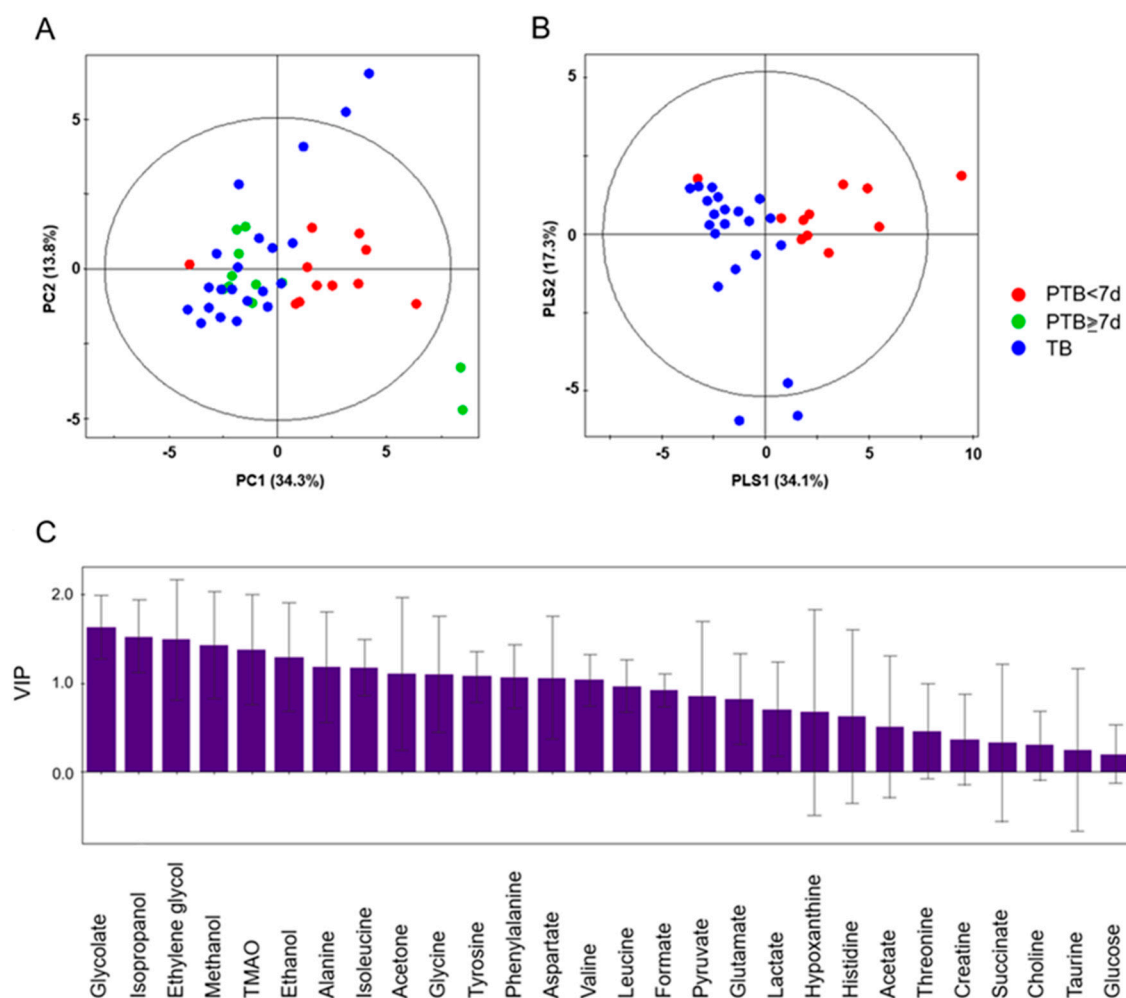

32

33 **Supplementary Figure 2. Multivariate statistical analyses of CVF samples.** (A) The  
 34 Principal Component Analysis (PCA) and (B) Partial Least Squares-Discriminant Analysis  
 35 (PLS-DA) scatter plot obtained from the quantified NMR data (PCA:  $R^2X=0.482$ ,  $Q^2=0.186$ ;  
 36 PLS-DA:  $R^2X=0.515$ ,  $R^2Y=0.561$ ,  $Q^2=0.322$ ). (C) Variable importance plot (VIP) of the PLS-  
 37 DA model. PTB>7d: Preterm birth less than 7 days after CVF sampling; PTB<7d: Preterm  
 38 birth more than 7 days after CVF sampling; and TB: Term birth.
